# Supplementary material for: Controlling high coercivities of ferromagnetic nanowires encapsulated in carbon nanotubes
Source: Royal Society of Chemistry journal article supplement (doi:10.1039/c0jm00660b), 2010-01-01
Supplement: c0jm00660b.pdf [file c0jm00660b.pdf]

## Supplementary Data

Figure A: Morelos-Gómez et al.

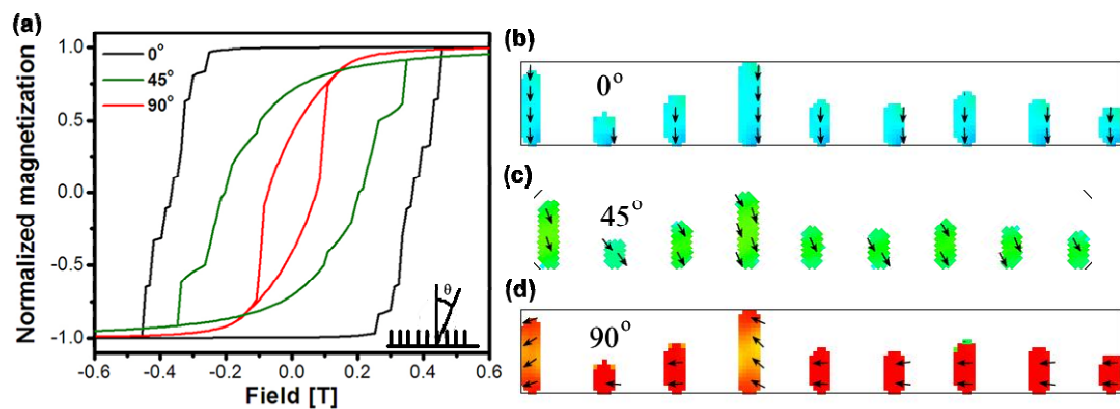

Figure A: Micromagnetic simulations of an array of aligned Fe nanowires with several heights. (a) Hysteresis curves of the external magnetic field applied at 0°, 45° and 90° with respect to the nanowire axis. Vector field of the magnetization in the Fe particle array with the external magnetic field applied at (b) 0°, (c) 45° and (d) 90° with respect to the particle axis.
